# Supplementary material for: One-pot in situ chemical reduction of graphene oxide and recombination of sulphur as a cathode material for a Li–S battery
Source: Royal Society of Chemistry journal article supplement (doi:10.1039/c6ta03555h), 2016-01-01
Supplement: c6ta03555h1.pdf [file c6ta03555h1.pdf]

*Supporting information*

**One-pot in situ chemical reduction graphene oxide  
and recombination of sulphur as the cathode material  
of Li-S battery**

Weiwei Qian, Qiuming Gao\*, Weiqian Tian, Hang Zhang, Yanli Tan and Zeyu Li

---

Key Laboratory of Bio-inspired Smart Interfacial Science and Technology of  
Ministry of Education, Beijing Key Laboratory of Bio-inspired Energy Materials  
and Devices, School of Chemistry and Environment, Beihang University, Beijing,  
100191, P. R. China.

E-mail: qmgao@buaa.edu.cn; Fax:/Tel: +861082338212.

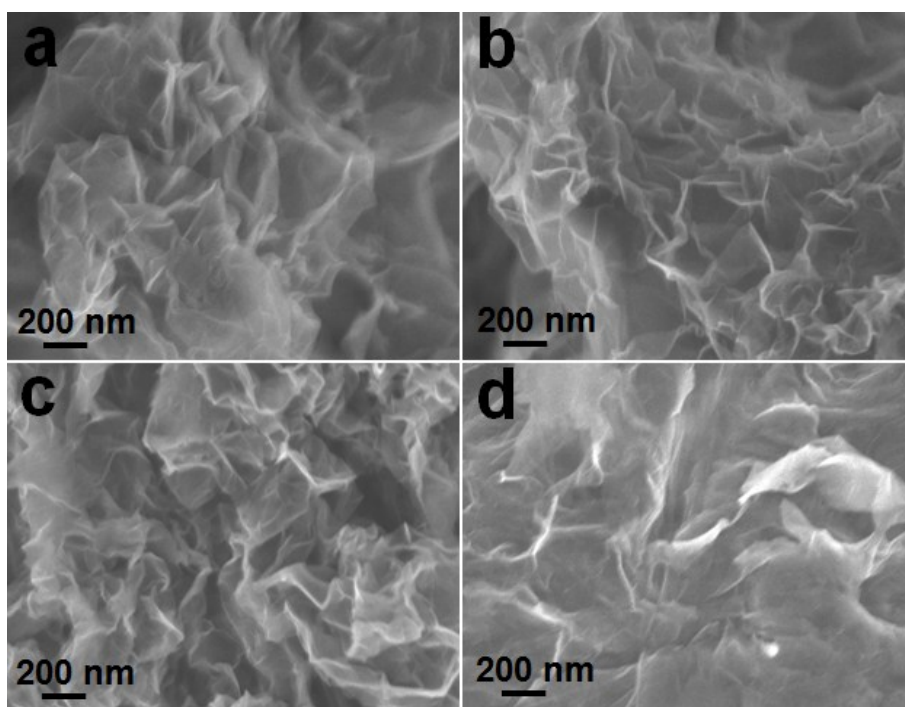

**Figure S1.** SEM images of rGO/S-2 (a), rGO/S-3 (b), rGO/S-7(c) and rGO/S-12 (d).

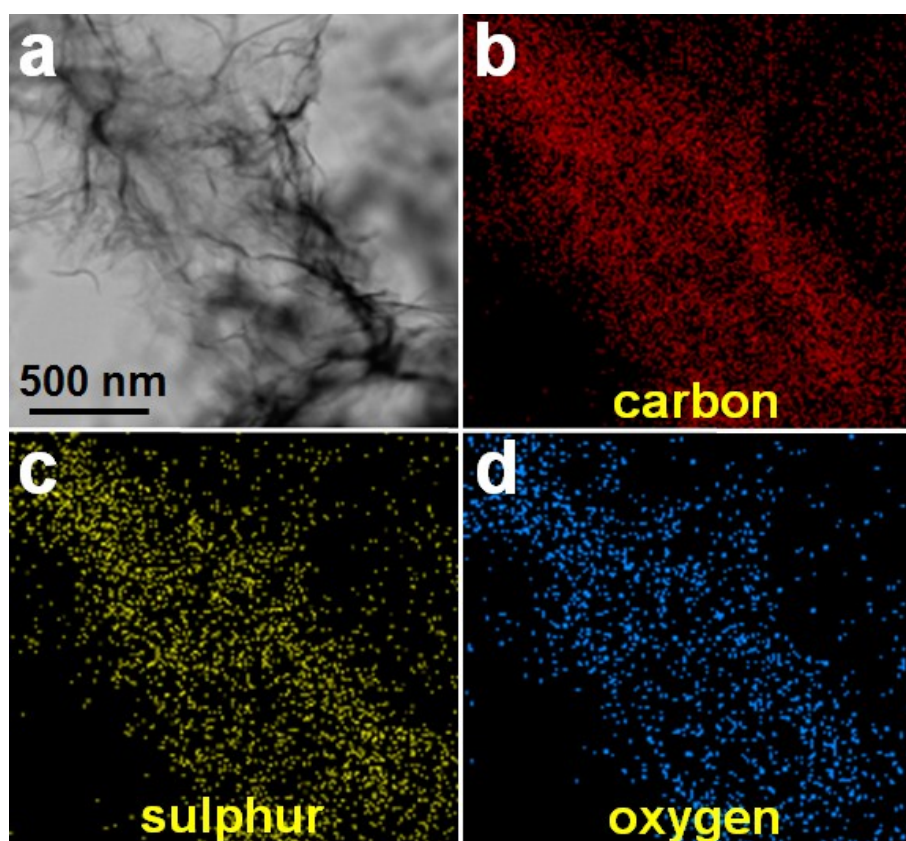

**Figure S2.** TEM (a) and the related EDS elemental mapping images of sulphur (b), carbon (c) and oxygen (d) micrograph of the rGO/S-3 composite.

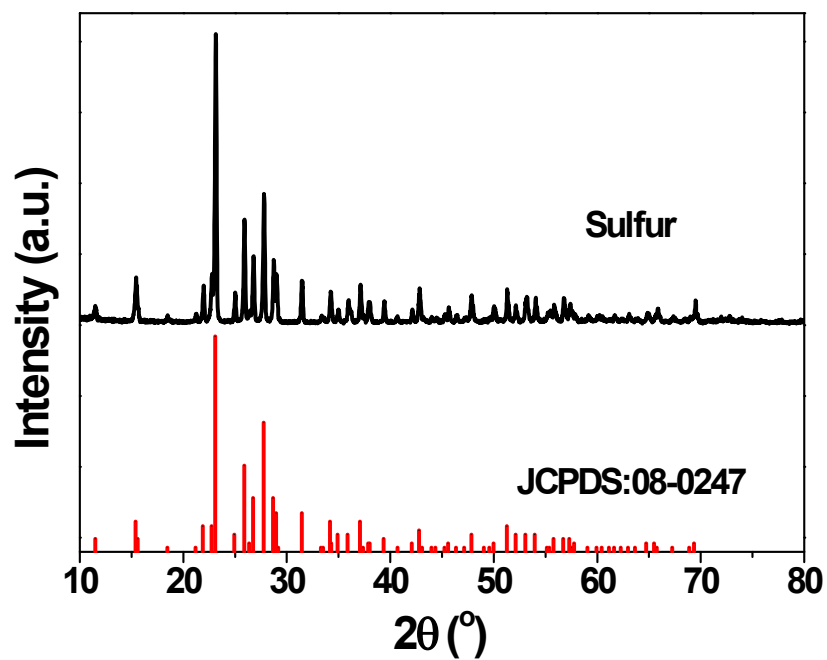

**Figure S3.** XRD patterns (black) of sulphur and its standard patterns (red).

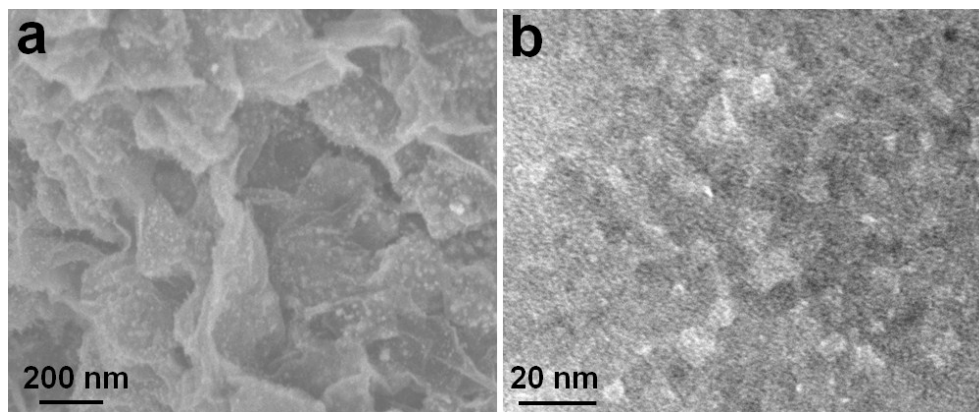

**Figure S4.** (a) SEM and (b) TEM images of the rGO/S-3 composite after 1200 cycles at 1 C in the Li-S battery.

**Table S1.** The elements content analysis of the rGO/S-xcomposite samples

| Sample   | C<br>(wt.%) | S<br>(wt.%) | O<br>(wt.%) |
|----------|-------------|-------------|-------------|
| rGO/S-2  | 18.3        | 72.4        | 9.0         |
| rGO/S-3  | 22.9        | 73.5        | 3.2         |
| rGO/S-7  | 22.7        | 73.7        | 3.0         |
| rGO/S-12 | 22.7        | 75.5        | 1.1         |
